# Supplementary material
Source: Springer Nature journal article supplement (https://www.springermedizin.de/resource/supplementary/12889_2010_3290_MOESM2_ESM.pdf/9488640)

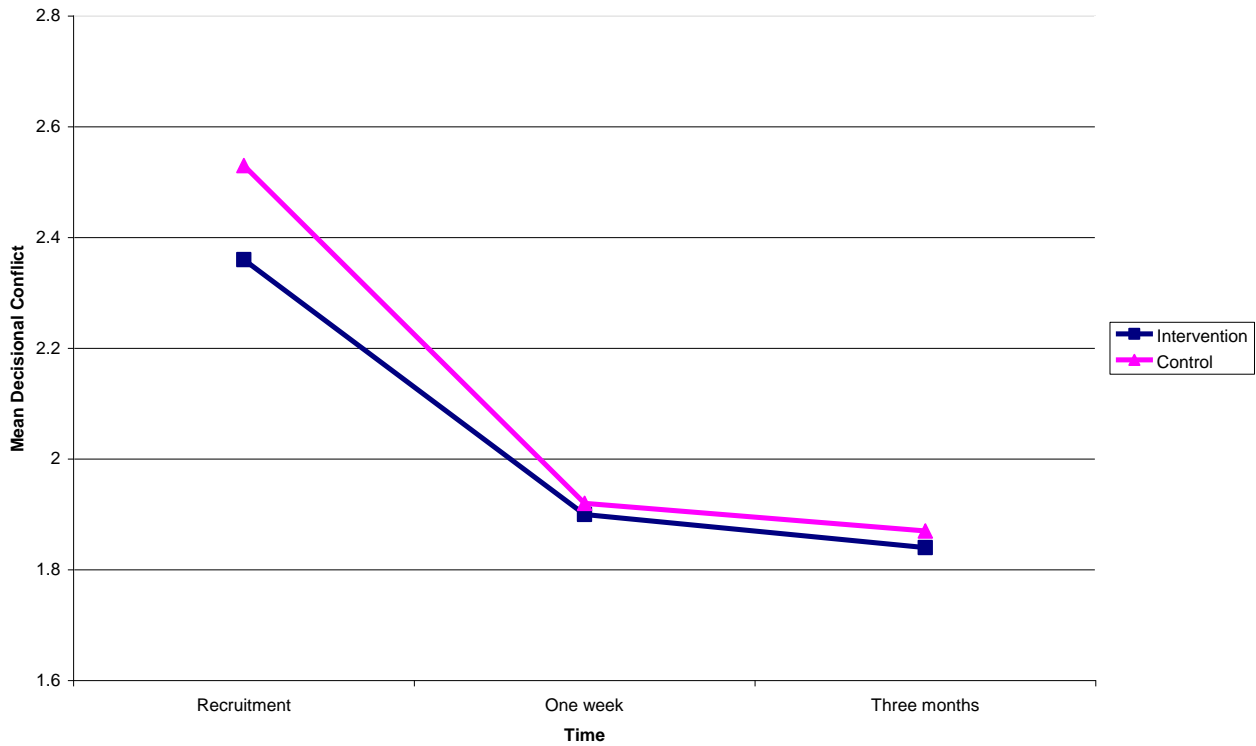

Supplement: MOESM2 [file 9488640]
